# Supplementary material for: High-Throughput Cloning and Characterization of Emerging Adenovirus Types 70, 73, 74, and 75
Source: PubMed Central journal article supplement (PMC7504450; doi:10.3390/ijms21176370), 2020-09-02
Supplement: ijms-21-06370-s001.pdf [file ijms-21-06370-s001.pdf]

Table S1. Oligonucleotides for amplification of p15A-cm linear vectors

| Name          | Sequence                                                                          | Note /application       |
|---------------|-----------------------------------------------------------------------------------|-------------------------|
| Ad9-HA30-F/R  | ttactttgtgggtatattatagatag                                                        | p15A-cm-Ad9HA30<br>PCR  |
| Ad9-HA50-F/R  | gctcatttgcataacttttg                                                              | p15A-cm-Ad9HA50<br>PCR  |
| Ad9-HA100-F/R | tcgtccaatcagcgttgct                                                               | p15A-cm-Ad9H100<br>PCR  |
| Ad9-HA150-F/R | cgaccgttagccgtgcgt                                                                | p15A-cm-Ad9HA150<br>PCR |
| Ad9-HA200-fwd | cgccatgttcccacgtcca                                                               | p15A-cm-Ad9HA200<br>PCR |
| Ad9-HA200-rev | gcgacttgctccgggctag                                                               |                         |
| Ad9-HA500-fwd | aagcatacagagattcagccata                                                           | p15A-cm-Ad9HA500<br>PCR |
| Ad9-HA500-rev | acggactcgactggttaaatac                                                            |                         |
| Ad-D70-HA-fwd | Agctcatttgcataacttttgtttactttgtgggtatattattgatgatg<br>CCTGCAGGATTTAAATTAATTAAGCGA | p15A-cm-Ad70HA50<br>PCR |
| Ad-D70-HA-rev | Agctcatttgcataacttttgtttactttgtgggtatattattgatgatg<br>GTTTAAACGGCCGGCCTAG         |                         |

Table S2. Oligonucleotides for detective PCR

| Name        | Sequence               | Note /application                            |
|-------------|------------------------|----------------------------------------------|
| diag9-fwd   | atcttctggggcatctctt    | Diagnostic PCR to detect E2A<br>DBP of Ad9   |
| diag9-rev   | tgttcagcagcacatcctc    |                                              |
| CMR-fwd     | TGGAGTGAATACCACGACGA   | Diagnostic PCR to detect<br>plasmid backbone |
| CMR-rev     | ATCACAGACGGCATGATGAA   |                                              |
| Ad-qPCR fwd | caggacgcctcggagtacctga | Viral genome copy number<br>quantification   |
| Ad-qPCR rev | gggccaccgtggggttc      |                                              |
|             |                        |                                              |
|             |                        |                                              |
|             |                        |                                              |
|             |                        |                                              |

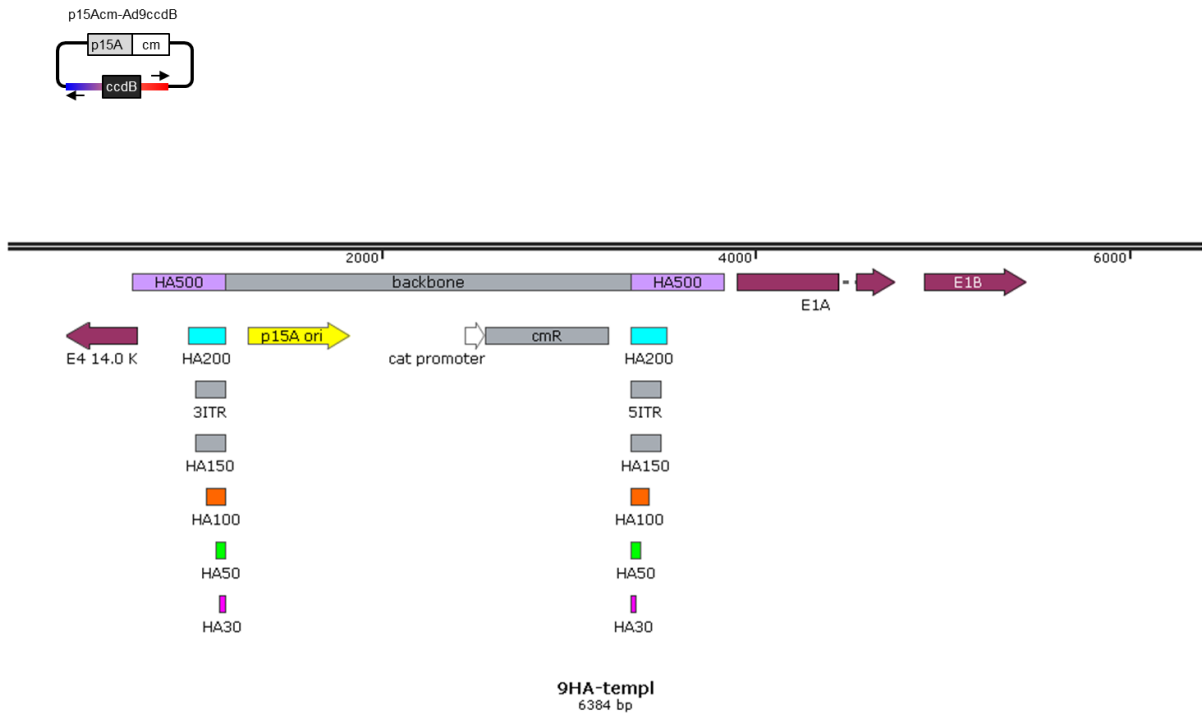

**Figure S1.** Generation of the cloning vector with increased HA-lengths: ~30, ~50, ~100, ~150, ~200, ~500 bp. Scheme shows the position of homologous arms. A pre-generated plasmid p15Acm-Ad9ccdB was used as template. This plasmid is gAd9 cloned into p15A-cm backbone, with a ccdB insertion in the E3 genome region to avoid plasmid contamination in PCR.

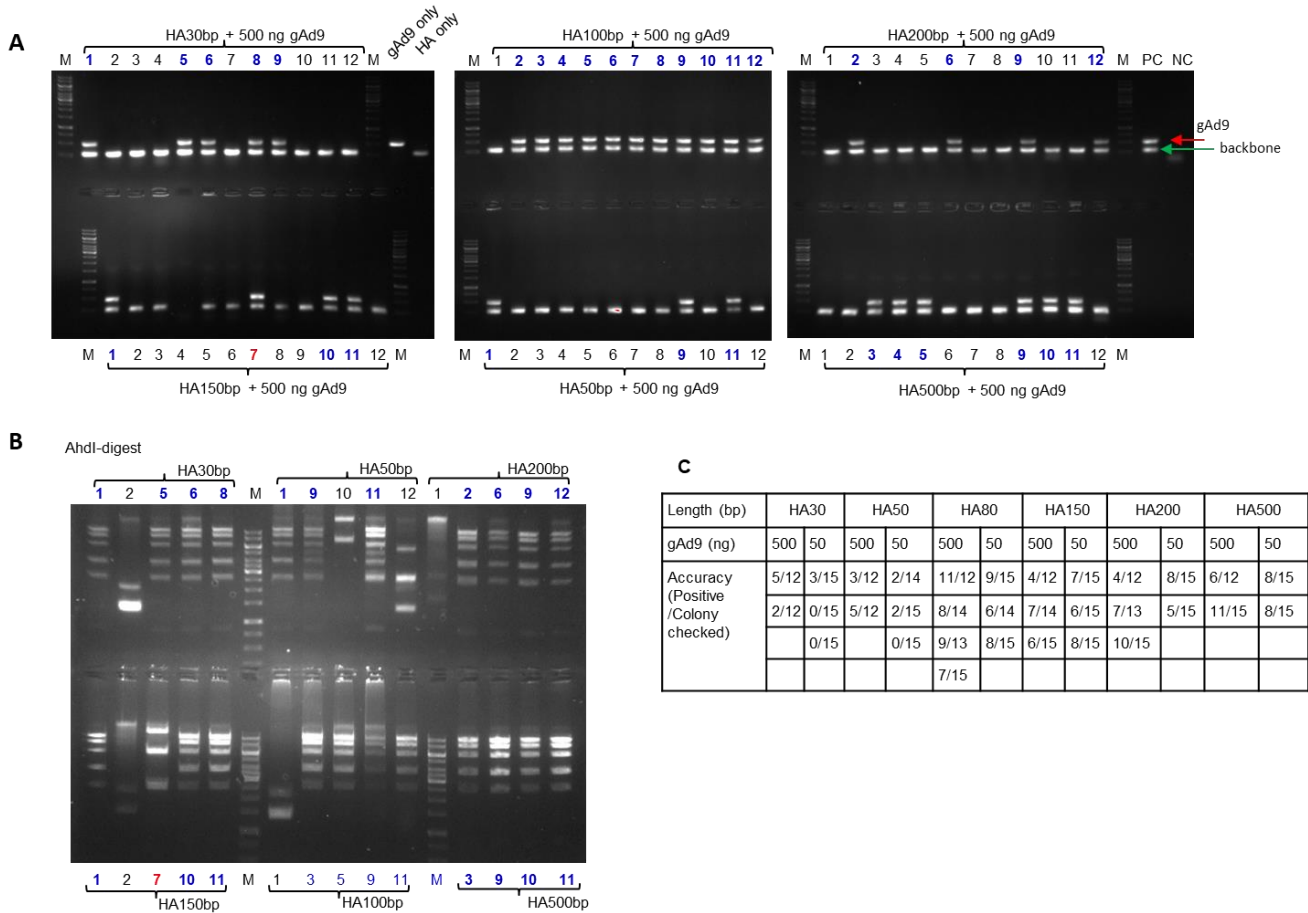

7/31/2020

**Figure S2.** Positive clone detection. **A.** Representative gel of colony-PCR to detect cloned gAd9. Presented are the analyses of 12 colonies per setting and a blue number indicates the clones to be gAd positive. gAd9, HA-only and a previously cloned Ad9 are included as control. The detection of gAd9 gives a 500-bp band, and the backbone detection gives a band of 250 bp in size. **B.** Ahdi restriction analysis of the cloned adenoviral genome in p15A. Correct clones are indicated with a blue number, while the red number 7 in the HA150 group was a false-positive clone detected by colony-PCR. **C.** Summary of cloning accuracy.
